# Supplementary material
Source: ML conference proceedings conference paper supplement (https://proceedings.neurips.cc/paper_files/paper/2018/hash/3ffebb08d23c609875d7177ee769a3e9-Abstract.html)
Supplement: Supplementary file [file 3ffebb08d23c609875d7177ee769a3e9-Supplemental.zip]

## A Proof of Theorem 3.1: Integration error of discretized diffusions

*Proof of Theorem 3.1.* Denoting by  $\Delta X_m = X_{m+1} - X_m$  and using the integral form Taylor's theorem on  $u_f(X_{m+1})$  around the previous iterate  $X_m$ , and taking expectations, we obtain

$$\begin{aligned}\mathbb{E}[u_f(X_{m+1}) - u_f(X_m)] &= \mathbb{E}[\langle \nabla u_f(X_m), \Delta X_m \rangle] + \frac{1}{2} \mathbb{E}[\langle \Delta X_m, \nabla^2 u_f(X_m) \Delta X_m \rangle] \\ &\quad + \frac{1}{6} \mathbb{E}[\langle \Delta X_m, \nabla^3 u_f(X_m) [\Delta X_m, \Delta X_m] \rangle] \\ &\quad + \frac{1}{6} \int_0^1 (1-\tau)^3 \mathbb{E}[\langle \Delta X_m, \nabla^4 u_f(X_m + \tau \Delta X_m) [\Delta X_m, \Delta X_m, \Delta X_m] \rangle] d\tau.\end{aligned}\tag{A.1}$$

The first term on the right hand side can be written as

$$\begin{aligned}\mathbb{E}[\langle \nabla u_f(X_m), \Delta X_m \rangle] &= \mathbb{E}[\langle \nabla u_f(X_m), \eta b(X_m) + \sqrt{\eta} \sigma(X_m) Z_m \rangle], \\ &= \eta \mathbb{E}[\langle \nabla u_f(X_m), b(X_m) \rangle] + \sqrt{\eta} \mathbb{E}[\langle \nabla u_f(X_m), \sigma(X_m) Z_m \rangle], \\ &= \eta \mathbb{E}[\langle \nabla u_f(X_m), b(X_m) \rangle],\end{aligned}$$

where in the last step, we used the fact that  $Z_m$  is independent from  $X_m$  and that odd moments of  $Z_m$  are 0. Similarly for the second and the third terms, we obtain respectively

$$\begin{aligned}\frac{1}{2} \mathbb{E}[\langle \Delta X_m, \nabla^2 u_f(X_m) \Delta X_m \rangle] \\ = \frac{\eta^2}{2} \mathbb{E}[\langle b(X_m), \nabla^2 u_f(X_m) b(X_m) \rangle] + \frac{\eta^2}{2} \mathbb{E}[\langle \nabla^2 u_f(X_m), \sigma \sigma^\top(X_m) \rangle],\end{aligned}$$

and

$$\begin{aligned}\frac{1}{6} \mathbb{E}[\langle \Delta X_m, \nabla^3 u_f(X_m) [\Delta X_m, \Delta X_m] \rangle] \\ = \frac{\eta^3}{6} \mathbb{E}[\langle b(X_m), \nabla^3 u_f(X_m) [b(X_m), b(X_m)] \rangle] + \frac{\eta^2}{2} \mathbb{E}[\langle \nabla^3 u_f(X_m) [b(X_m)], \sigma \sigma^\top(X_m) \rangle].\end{aligned}$$

By combining these with (3.2), we find that (A.1) can be written as

$$\begin{aligned}\mathbb{E}[u_f(X_{m+1}) - u_f(X_m)] &= \eta \{ \mathbb{E}[f(X_m)] - p(f) \} + \frac{\eta^2}{2} \mathbb{E}[\langle b(X_m), \nabla^2 u_f(X_m) b(X_m) \rangle] \\ &\quad + \frac{\eta^3}{6} \mathbb{E}[\langle b(X_m), \nabla^3 u_f(X_m) [b(X_m), b(X_m)] \rangle] \\ &\quad + \frac{\eta^2}{2} \mathbb{E}[\langle \nabla^3 u_f(X_m) [b(X_m)], \sigma \sigma^\top(X_m) \rangle] \\ &\quad + \frac{1}{6} \int_0^1 (1-\tau)^3 \mathbb{E}[\langle \Delta X_m, \nabla^4 u_f(X_m + \tau \Delta X_m) [\Delta X_m, \Delta X_m, \Delta X_m] \rangle] d\tau.\end{aligned}$$

Finally, dividing each term by  $\eta$ , averaging over  $m$ , and using the triangle inequality, we reach the bound

$$\begin{aligned}&\left| \frac{1}{M} \sum_{m=1}^M \mathbb{E}[f(X_m)] - p(f) \right| \\ &\leq \frac{1}{M\eta} \left| \sum_{m=1}^M \mathbb{E}[u_f(X_{m+1}) - u_f(X_m)] \right| + \frac{\eta}{2M} \left| \sum_{m=1}^M \mathbb{E}[\langle b(X_m), \nabla^2 u_f(X_m) b(X_m) \rangle] \right| \\ &\quad + \frac{\eta^2}{6M} \left| \sum_{m=1}^M \mathbb{E}[\langle b(X_m), \nabla^3 u_f(X_m) [b(X_m), b(X_m)] \rangle] \right| \\ &\quad + \frac{\eta}{2M} \left| \sum_{m=1}^M \mathbb{E}[\langle \nabla^3 u_f(X_m) [b(X_m)], \sigma \sigma^\top(X_m) \rangle] \right| \\ &\quad + \frac{1}{6M\eta} \left| \sum_{m=1}^M \int_0^1 (1-\tau)^3 \mathbb{E}[\langle \Delta X_m, \nabla^4 u_f(X_m + \tau \Delta X_m) [\Delta X_m, \Delta X_m, \Delta X_m] \rangle] d\tau \right|.\end{aligned}\tag{A.2}$$

For the first term on the right hand side, using Condition 3 and Lemma A.2, we can write

$$\begin{aligned}\left| \sum_{m=1}^M \mathbb{E}[u_f(X_{m+1}) - u_f(X_m)] \right| &= |\mathbb{E}[u_f(X_{M+1}) - u_f(X_1)]| \\ &\leq \tilde{\mu}_{1,n}(u_f) \mathbb{E}[(1 + \|X_{M+1}\|_2^n + \|X_1\|_2^n) \|X_{M+1} - X_1\|_2], \\ &\leq \tilde{\mu}_{1,n}(u_f) \mathbb{E}[2 + 3\|X_{M+1}\|_2^{n+1} + 3\|X_1\|_2^{n+1}], \\ &\leq 6\tilde{\mu}_{1,n}(u_f) \left( 2 + \frac{2\beta_{r,n,e}}{\alpha} + \|x\|_2^{n_e} \right).\end{aligned}\tag{A.3}$$

where we used Young's inequality in the second step and Lemma A.2 in the last step.

The second term in the above inequality can be bounded by

$$\begin{aligned}
\frac{\eta}{2M} \left| \sum_{m=1}^M \mathbb{E}[\langle b(X_m), \nabla^2 u_f(X_m) b(X_m) \rangle] \right| &\leq \frac{\eta}{2M} \sum_{m=1}^M \mathbb{E}[\langle b(X_m), \nabla^2 u_f(X_m) b(X_m) \rangle] \\
&\leq \frac{\eta}{2M} \sum_{m=1}^M \mathbb{E}[\|\nabla^2 u_f(X_m)\|_{\text{op}} \|b(X_m)\|_2^2] \\
&\leq \frac{\eta \lambda_b^2}{32M} \sum_{m=1}^M \mathbb{E}[\zeta_2 (1 + \|X_m\|_2^n) (1 + \|X_m\|_2^2)^2] \\
&\leq \frac{\eta \lambda_b^2 \zeta_2}{8M} \sum_{m=1}^M \mathbb{E}[1 + \|X_m\|_2^{n+2}] \\
&\leq \frac{\eta \lambda_b^2 \zeta_2}{8} \left( 2 + \frac{2\beta_{r,n_e}}{\alpha} + \|x\|_2^{n_e} \right),
\end{aligned} \tag{A.4}$$

where in the last step we used Lemma A.2.

Similarly, the third and the fourth terms in the inequality (A.2) can be bounded as

$$\begin{aligned}
\frac{\eta^2}{6M} \left| \sum_{m=1}^M \mathbb{E}[\langle b(X_m), \nabla^3 u_f(X_m) [b(X_m)] b(X_m) \rangle] \right| &\leq \frac{\eta^2 \lambda_b^3 \zeta_3}{48M} \sum_{m=1}^M \mathbb{E}[1 + \|X_m\|_2^{n+3}] \\
&\leq \frac{\eta^2 \lambda_b^3 \zeta_3}{48} \left( 2 + \frac{2\beta_{r,n_e}}{\alpha} + \|x\|_2^{n_e} \right),
\end{aligned} \tag{A.5}$$

and

$$\begin{aligned}
\frac{\eta}{2M} \left| \sum_{m=1}^M \mathbb{E}[\langle \nabla^3 u_f(X_m) [b(X_m)], \sigma \sigma^\top(X_m) \rangle] \right| &\leq \frac{\eta \lambda_b \lambda_\sigma^2 \zeta_3}{16M} \sum_{m=1}^M \mathbb{E}[1 + \|X_m\|_2^{n+3}] \\
&\leq \frac{\eta \lambda_b \lambda_\sigma^2 \zeta_3}{16} \left( 2 + \frac{2\beta_{r,n_e}}{\alpha} + \|x\|_2^{n_e} \right).
\end{aligned} \tag{A.6}$$

For the last term, we write

$$\begin{aligned}
&\frac{1}{6\eta M} \left| \sum_{m=1}^M \mathbb{E} \left[ \int_0^1 (1-\tau)^3 \langle \Delta X_m, \nabla^4 u_f(X_m + \tau \Delta X_m) [\Delta X_m, \Delta X_m] \Delta X_m \rangle d\tau \right] \right| \\
&\leq \frac{1}{6\eta M} \sum_{m=1}^M \int_0^1 (1-\tau)^3 \zeta_4 \mathbb{E}[(1 + \|X_m + \tau \Delta X_m\|_2^n) \|\Delta X_m\|_2^4] d\tau.
\end{aligned}$$

We first bound the expectation in the above integral

$$\begin{aligned}
\mathbb{E}[(1 + \|X_m + \tau \Delta X_m\|_2^n) \|\Delta X_m\|_2^4] &\leq \mathbb{E}[8(\eta^4 \|b(X_m)\|_2^4 + \eta^2 \|\sigma(X_m) W_m\|_2^4) \\
&\quad \times (1 + 3^{n-1} \|X_m\|_2^n + 3^{n-1} \tau^n \eta^n \|b(X_m)\|_2^n + 3^{n-1} \tau^n \eta^{n/2} \|\sigma(X_m) W_m\|_2^n)] \\
&= A + \tau^n B, \quad \text{where} \\
A &\triangleq 8\mathbb{E}[(1 + 3^{n-1} \|X_m\|_2^n)(\eta^4 \|b(X_m)\|_2^4 + \eta^2 \|\sigma(X_m) W_m\|_2^4)] \\
B &\triangleq 8 \cdot 3^{n-1} \mathbb{E}[(\eta^n \|b(X_m)\|_2^n + \eta^{n/2} \|\sigma(X_m) W_m\|_2^n)(\eta^4 \|b(X_m)\|_2^4 + \eta^2 \|\sigma(X_m) W_m\|_2^4)].
\end{aligned} \tag{A.7}$$

Using Condition 1, Lemma E.1 and  $\eta < 1$ , we obtain

$$\begin{aligned}
A &\leq 8 \left\{ \eta^4 \left[ \frac{\lambda_b^4}{32} \mathbb{E}[1 + \|X_m\|_2^4] + 3^{n-1} \frac{\lambda_b^4}{16} \mathbb{E}[1 + \|X_m\|_2^{n+4}] \right] \right. \\
&\quad \left. + \eta^2 \left[ \frac{3\lambda_\sigma^4}{32} \mathbb{E}[1 + \|X_m\|_2^4] + 3^n \frac{\lambda_\sigma^4}{16} \mathbb{E}[1 + \|X_m\|_2^{n+4}] \right] \right\} \\
&\leq \frac{1+3^{n-1}}{2} (\eta^4 \lambda_b^4 + 3\eta^2 \lambda_\sigma^4) \mathbb{E}[1 + \|X_m\|_2^{n+4}], \quad \text{and} \\
B &\leq 8 \cdot 3^{n-1} \eta^{2+n/2} \mathbb{E}[\eta^{2+n/2} \|b(X_m)\|_2^{n+4} + \eta^2 \|b(X_m)\|_2^4 \|\sigma(X_m) W_m\|_2^n \\
&\quad + 3 \|b(X_m)\|_2^n \|\sigma(X_m) W_m\|_2^4 + \|\sigma(X_m) W_m\|_2^{n+4}] \\
&\leq \eta^{2+n/2} \frac{3^{n-1}}{2^{n+2}} (\eta^2 \lambda_b^4 + (n+4)(n+2) \lambda_\sigma^4) (\eta^{n/2} \lambda_b^n + n!! \lambda_\sigma^n) \mathbb{E}[1 + \|X_m\|_2^{n+4}], \\
&\leq \eta^{2+n/2} \frac{1}{12} 1.5^n (\lambda_b^4 + n_e^2 \lambda_\sigma^4) (\lambda_b^n + n!! \lambda_\sigma^n) \mathbb{E}[1 + \|X_m\|_2^{n+4}].
\end{aligned}$$

Plugging this in (A.7), we obtain

$$\begin{aligned}
&\mathbb{E}[(1 + \|X_m + \tau \Delta X_m\|_2^n) \|\Delta X_m\|_2^4] \\
&\leq \mathbb{E}[1 + \|X_m\|_2^{n+4}] \left[ \frac{1+3^{n-1}}{2} (\eta^4 \lambda_b^4 + 3\eta^2 \lambda_\sigma^4) + \tau^n \eta^{2+n/2} \frac{1}{12} 1.5^n (\lambda_b^4 + n_e^2 \lambda_\sigma^4) (\lambda_b^n + n!! \lambda_\sigma^n) \right].
\end{aligned}$$

Therefore, the last term in (A.2) can be bounded by

$$\begin{aligned} & \frac{1}{6\eta M} \left| \sum_{m=1}^M \mathbb{E} \left[ \int_0^1 (1-\tau)^3 \langle \Delta X_m, \nabla^4 u_f(X_m + \tau \Delta X_m) [\Delta X_m, \Delta X_m] \Delta X_m \rangle d\tau \right] \right| \\ & \leq \frac{\zeta_4 \eta}{6} \frac{1}{M} \sum_{m=1}^M \mathbb{E} [1 + \|X_m\|_2^{n+4}] \\ & \times \int_0^1 (1-\tau)^3 \left( \frac{1+3^{n-1}}{2} (\eta^4 \lambda_b^4 + 3\eta^2 \lambda_\sigma^4) + \tau^n \eta^{2+n/2} \frac{1}{12} 1.5^n (\lambda_b^4 + n_e^2 \lambda_\sigma^4) (\lambda_b^n + n!! \lambda_\sigma^n) \right) d\tau. \end{aligned} \quad (\text{A.8})$$

Using Lemma A.2 and

$$\int_0^1 (1-\tau)^3 \tau^n d\tau \leq \frac{6}{n^4} \quad \text{and} \quad \int_0^1 (1-\tau)^3 d\tau = \frac{1}{4},$$

the right hand side of (A.8) can be bounded by

$$\frac{\zeta_4 \eta}{6} \left( \frac{1+3^{n-1}}{8} (\eta^2 \lambda_b^4 + 3\lambda_\sigma^4) + \eta^{n/2} \frac{1}{2n^4} 1.5^n (\lambda_b^4 + n_e^2 \lambda_\sigma^4) (\lambda_b^n + n!! \lambda_\sigma^n) \right) \left( 2 + \frac{2\beta_{r,n_e}}{\alpha} + \|x\|_2^{n_e} \right). \quad (\text{A.9})$$

Combining the above bounds in (A.3), (A.4), (A.5), (A.6) and (A.9) and applying them on (A.2), we reach the final bound

$$\left| \frac{1}{M} \sum_{m=1}^M \mathbb{E}[f(X_m)] - p(f) \right| \leq \left( c_1 \frac{1}{\eta M} + c_2 \eta + c_3 \eta^{1+|1 \wedge n/2|} \right) (\kappa_r + \|x\|_2^{n_e})$$

where

$$\begin{aligned} c_1 &= 6\zeta_1, \\ c_2 &= \frac{1}{16} \left[ \zeta_2 2\lambda_b^2 + \zeta_3 \lambda_b \lambda_\sigma^2 + \zeta_4 (1 + 3^{n-1}) \lambda_\sigma^4 \right], \\ c_3 &= \frac{1}{48} \left[ \zeta_3 \lambda_b^3 + \zeta_4 \lambda_b^4 (1 + 3^{n-1}) + \zeta_4 4 \frac{1.5^n}{n^4} (\lambda_b^4 + n_e^2 \lambda_\sigma^4) (\lambda_b^n + n!! \lambda_\sigma^n) \right], \quad \text{and} \\ \kappa_r &= 2 + \frac{2\beta}{\alpha} + \frac{n_e \lambda_a}{4\alpha} + \frac{\tilde{\alpha}_r}{\alpha} \left( \frac{n_e \lambda_a + 6r\beta}{2r\tilde{\alpha}_r} \right)^{n_e}, \end{aligned}$$

for  $\tilde{\alpha}_1 = \alpha$  and  $\tilde{\alpha}_2 = [\alpha - n_e \lambda_a / 4]_+$ . □

### A.1 Dissipativity for higher order moments

It is well known that the dissipativity condition on the second moment carries directly to the higher order moments [22]. The following lemma will be useful when we bound the higher order moments of the discretized diffusion.

**Lemma A.1.** *For  $n \geq k \geq 2$ , we have the following relation*

$$\mathcal{A} \|x\|_2^n = \frac{n}{k} \|x\|_2^{n-k} \mathcal{A} \|x\|_2^k + \frac{1}{2} n(n-k) \|x\|_2^{n-4} \|\sigma^\top(x)\|_2^2.$$

Further, assume that Conditions 1 and 2 hold, and  $n \geq 3$ . Then,

$$\mathcal{A} \|x\|_2^n \leq -\alpha \|x\|_2^n + \beta_{r,n}$$

where

$$\beta_{r,n} = \beta + \frac{n\lambda_a}{8} + \frac{\tilde{\alpha}_r}{2} \left( \frac{n\lambda_a + 6r\beta}{2r\tilde{\alpha}_r} \right)^n,$$

with  $\tilde{\alpha}_2 = [\alpha - n\lambda_a/4]_+$  and  $\tilde{\alpha}_1 = \alpha$ .

*Proof.* The proof for the first statement easily follows from the following expression,

$$\mathcal{A} \|x\|_2^n = n \|x\|_2^{n-2} \langle x, b(x) \rangle + \frac{1}{2} n(n-2) \|x\|_2^{n-4} \langle x x^\top, \sigma \sigma^\top(x) \rangle + \frac{1}{2} n \|x\|_2^{n-2} \|\sigma(x)\|_F^2.$$

For second statement, we use the first statement with  $k = 2$  and Conditions 1 and 2. First, we consider the case  $r = 1$  and write

$$\begin{aligned} \mathcal{A} \|x\|_2^n &= \frac{1}{2} n \|x\|_2^{n-2} \mathcal{A} \|x\|_2^2 + \frac{1}{2} n(n-2) \|x\|_2^{n-4} \langle x x^\top, \sigma \sigma^\top(x) \rangle, \\ &\leq -\frac{1}{2} \alpha n \|x\|_2^n + \frac{1}{2} \beta n \|x\|_2^{n-2} + \frac{\lambda_a}{8} n(n-2) (\|x\|_2^{n-1} + \|x\|_2^{n-2}), \\ &= -\frac{1}{2} \alpha n \|x\|_2^n + \frac{\lambda_a}{8} n(n-2) \|x\|_2^{n-1} + \left\{ \frac{1}{2} \beta n + \frac{\lambda_a}{8} n(n-2) \right\} \|x\|_2^{n-2}. \end{aligned}$$

Using the inequality given in Lemma E.3 twice, we obtain

$$\begin{aligned} \mathcal{A} \|x\|_2^n &\leq -\frac{1}{2} \alpha n \|x\|_2^n + \left\{ \frac{\lambda_a}{4} n(n-2) + \frac{1}{2} \beta n \right\} \|x\|_2^{n-1} + \beta + \frac{\lambda_a n}{8}, \\ &\leq -\alpha \|x\|_2^n + \frac{\alpha(n-2)}{2n} \left( \frac{n\lambda_a}{2\alpha} + \frac{\beta n}{\alpha(n-2)} \right)^n + \frac{n(n-2)\lambda_a}{8(n-1)} + \frac{n\beta}{2(n-1)}. \end{aligned}$$

Same calculation yields a similar expression for the case  $r = 2$ . Generalizing, we obtain the following formula,

$$\begin{aligned} \mathcal{A} \|x\|_2^n &\leq -\alpha \|x\|_2^n + \frac{\alpha_r(n-2)}{2n} \left( \frac{n\lambda_a}{2r\alpha_r} + \frac{n\beta}{(n-2)\alpha_r} \right)^n + \frac{n(n-2)\lambda_a}{8(n-1)} + \frac{n\beta}{2(n-1)}, \\ &\leq -\alpha \|x\|_2^n + \frac{\alpha_r}{2} \left( \frac{n\lambda_a + 6r\beta}{2r\alpha_r} \right)^n + \frac{n\lambda_a}{8} + \beta. \end{aligned}$$

□

## A.2 Proof of Lemma A.2: Markov Chain Moment Bounds

**Lemma A.2.** *Let the Conditions 1 and 2 hold. For  $n \geq 1$ , denote by  $n_e$  an even integer satisfying  $n_e \geq n$ . If the step size satisfies*

$$\eta < 1 \wedge \frac{\alpha}{2(n_e-1)!!(1+\lambda_b/2+\lambda_\sigma/2)^{n_e}},$$

*then we have*

$$\begin{aligned} \mathbb{E}[\|X_m\|_2^{n_e}] &\leq \|x\|_2^{n_e} + 1 + \frac{2\beta_{r,n_e}}{\alpha}, \\ \frac{1}{M} \sum_{m=1}^M \mathbb{E}[\|X_m\|_2^{n_e}] &\leq \|x\|_2^{n_e} + 1 + \frac{2\beta_{r,n_e}}{\alpha}. \end{aligned}$$

*Proof of Lemma A.2.* First, we handle the even moments. For  $n \geq 1$ , we write

$$\begin{aligned} \mathbb{E}[\|X_m + \eta b(X_m) + \sqrt{\eta} \sigma(X_m) W_m\|_2^{2n}] &= \mathbb{E}\left[\left(\|X_m\|_2^2 + \eta^2 \|b(X_m)\|_2^2 + \eta \|\sigma(X_m) W_m\|_2^2 \right. \right. \\ &\quad \left. \left. + 2\eta \langle X_m, b(X_m) \rangle + 2\eta^{0.5} \langle X_m, \sigma(X_m) W_m \rangle + 2\eta^{1.5} \langle b(X_m), \sigma(X_m) W_m \rangle\right)^n\right] \\ &\stackrel{1}{=} \sum_{k_1+k_2+\dots+k_6=n} \binom{n}{k_1, k_2, \dots, k_6} \eta^{2k_2+k_3+k_4+k_5/2+3k_6/2} 2^{k_4+k_5+k_6} \\ &\quad \mathbb{E}\left[\|X_m\|_2^{2k_1} \|b(X_m)\|_2^{2k_2} \|\sigma(X_m) W_m\|_2^{2k_3} \langle X_m, b(X_m) \rangle^{k_4} \langle X_m, \sigma(X_m) W_m \rangle^{k_5} \langle b(X_m), \sigma(X_m) W_m \rangle^{k_6}\right], \\ &\stackrel{2}{\leq} \mathbb{E}[\|X_m\|_2^{2n}] + \eta \mathbb{E}[\mathcal{A} \|X_m\|_2^{2n}] + \sum_{\substack{k_1+k_2+\dots+k_6=n \\ k_5+k_6 \text{ is even} \\ 2k_2+k_3+k_4+k_5/2+3k_6/2 > 1}} \binom{n}{k_1, k_2, \dots, k_6} \eta^{2k_2+k_3+k_4+k_5/2+3k_6/2} 2^{k_4+k_5+k_6} \\ &\quad \mathbb{E}\left[\|X_m\|_2^{2k_1+k_4+k_5} \|b(X_m)\|_2^{2k_2+k_4+k_6} \|\sigma(X_m) W_m\|_2^{2k_3+k_5+k_6}\right] \\ &\stackrel{3}{\leq} \sum_{\substack{k_1+k_2+\dots+k_6=n \\ k_5+k_6 \text{ is even} \\ 2k_2+k_3+k_4+k_5/2+3k_6/2 > 1}} \binom{n}{k_1, k_2, \dots, k_6} (2k_3+k_5+k_6-1)!! \eta^{2k_2+k_3+k_4+k_5/2+3k_6/2} 2^{k_4+k_5+k_6} \\ &\quad \mathbb{E}\left[\|X_m\|_2^{2k_1+k_4+k_5} \|b(X_m)\|_2^{2k_2+k_4+k_6} \|\sigma(X_m)\|_F^{2k_3+k_5+k_6}\right] + (1-\eta\alpha) \mathbb{E}[\|X_m\|_2^{2n}] + \eta\beta_{r,2n} \\ &\stackrel{4}{\leq} (1-\eta\alpha + \eta^2 2\rho_n) \mathbb{E}[\|X_m\|_2^{2n}] + \eta\beta_{r,2n} + \eta^2 \rho_n \end{aligned}$$

where

$$\rho_n = \frac{1}{2} \sum_{\substack{k_1+k_2+\dots+k_6=n \\ k_5+k_6 \text{ is even} \\ 2k_2+k_3+k_4+k_5/2+3k_6/2 > 1}} \binom{n}{k_1, k_2, \dots, k_6} (2k_3+k_5+k_6-1)!! \frac{\lambda_b^{2k_2+k_4+k_6} \lambda_\sigma^{2k_3+k_5+k_6}}{2^{2k_2+2k_3+k_6}}.$$

In the above derivation, step (1) follows from multinomial expansion theorem, step (2) follows from that the odd moments of a Gaussian random variable is 0, and that the terms with coefficient  $\eta$  add up to  $\mathbb{E}[\mathcal{A} \|X_m\|_2^{2n}]$ . Step (3) follows from Cauchy-Schwartz, Lemma E.1, and Condition 2, and finally step (4) uses Condition 1 and the fact that  $\eta < 1$ .

A compact and more interpretable estimate for  $\rho_n$  can be obtained as follows,

$$\begin{aligned} \rho_n &\leq \frac{1}{2} (2n-1)!! \sum_{k_1+k_2+\dots+k_6=n} \binom{n}{k_1, k_2, \dots, k_6} \frac{\lambda_b^{2k_2+k_4+k_6} \lambda_\sigma^{2k_3+k_5+k_6}}{2^{2k_2+2k_3+k_6}} \\ &= \frac{1}{2} (2n-1)!! \left(1 + \frac{\lambda_b}{2} + \frac{\lambda_\sigma}{2}\right)^{2n}. \end{aligned}$$

The above result reads

$$\mathbb{E}[\|X_{m+1}\|_2^{2n}] \leq \tau_n(\eta) \mathbb{E}[\|X_m\|_2^{2n}] + \tilde{\gamma}_n(\eta)$$

where  $\tau_n(\eta) = 1 - \eta\alpha + \eta^2 2\rho_n$ , and  $\tilde{\gamma}_n(\eta) = \eta\beta_{r,2n} + \eta^2 \rho_n$ . Notice that  $\tau_n(0) = 1$  and  $\tau'_n(0) = -\alpha$  is negative. Therefore, we may obtain  $\tau_n(\eta) < 1$  by choosing  $\eta$  small. More specifically, we have  $\tau_n(\eta) < 1$  when  $\eta < \alpha/2\rho_n$ , but by choosing  $\eta < \alpha/(4\rho_n)$  we have control over the second term as well. That is, by Lemma E.2, we immediately obtain

$$\begin{aligned} \mathbb{E}[\|X_m\|_2^{2n}] &\leq \tau_n(\eta)^m \|x\|_2^{2n} + \frac{\tilde{\gamma}_n(\eta)}{1-\tau_{2n}(\eta)} \\ &\leq \tau_n(\eta)^m \|x\|_2^{2n} + \frac{2\beta_{r,2n}+\alpha/2}{\alpha} \\ &\leq \|x\|_2^{2n} + \frac{2\beta_{r,2n}+\alpha}{\alpha} \end{aligned}$$

and

$$\frac{1}{M} \sum_{m=1}^M \mathbb{E}[\|X_m\|_2^{2n}] \leq \|x\|^{2n} + \frac{2\beta_{r,2n} + \alpha}{\alpha}$$

where we use a looser bound to ensure that the right hand side is larger than 1.

The above analysis only covers the even moments so far. For any integer  $n$ , denote by  $n_e$  an even integer that is not smaller than  $n$ . Then, by the Hölder's inequality we write

$$\begin{aligned} \mathbb{E}[\|X_m\|_2^n] &\leq \mathbb{E}[\|X_m\|_2^{n_e}]^{n/n_e} \leq \left( \|x\|^{n_e} + \frac{2\beta_{r,n_e} + \alpha}{\alpha} \right)^{n/n_e} \\ &\leq \|x\|^{n_e} + \frac{2\beta_{r,n_e}}{\alpha} + 1, \end{aligned}$$

which concludes the proof.  $\square$

## B Proof of Theorem 3.2: Stein Factor Bounds

Let  $(P_t)_{t=0}^\infty$  denote the transition semigroup of the diffusion  $(Z_t^x)_{t=0}^\infty$  with drift and diffusion coefficients  $b, \sigma$ , so that  $(P_t f)(x) = \mathbb{E}[f(Z_t^x)]$  for each  $x \in \mathbb{R}^d$  and  $t \geq 0$ . Define the function

$$\varphi_{i,n}(b, \sigma) \triangleq \mu_i(b) + n\mu_i(\sigma)^2 + \phi_i(\sigma)^2$$

and the constants

$$\begin{aligned} \gamma_{1,n} &= 1, \\ \theta_{1,n} &= n\varphi_{1,n-2}(b, \sigma), \\ \gamma_{2,n} &= \frac{\varphi_{2,n-2}(b, \sigma)}{n\varphi_{1,2n-2}(b, \sigma)}, \\ \theta_{2,n} &= 3n\varphi_{1,2n-2}(b, \sigma) + n\varphi_{2,n-2}(b, \sigma), \\ \gamma_{3,n} &= \frac{15\varphi_{2,n-2}(b, \sigma) + 5\varphi_{3,n-2}(b, \sigma)}{4n\varphi_{1,4n-2}(b, \sigma)}, \\ \theta_{3,n} &= 7n\varphi_{1,3n-2}(b, \sigma) + 10n\varphi_{2,n-2}(b, \sigma) + 3n\varphi_{3,n-2}(b, \sigma), \\ \gamma_{4,2} &= \frac{\varphi_{4,0}(b, \sigma) + 6\varphi_{3,0}(b, \sigma) + 5\varphi_{2,0}(b, \sigma)}{16\varphi_{1,6}(b, \sigma)}, \quad \text{and} \\ \theta_{4,2} &= 31\varphi_{1,5}(b, \sigma) + 27\varphi_{2,2}(b, \sigma) + 12\varphi_{3,1}(b, \sigma) + \varphi_{4,0}(b, \sigma). \end{aligned}$$

Our proof of Theorem 3.2 will use a representation of the Poisson equation solution in terms of the transition semigroup, i.e.,

$$u_f(x) = \int_0^\infty p(f) - (P_t f)(x) dt, \quad (\text{B.1})$$

coupled with the following bounds on the derivatives of the semigroup. See [12] for a proof of the above representation.

**Theorem B.1** (Semigroup derivative bounds [12]). *Let  $(P_t)_{t=0}^\infty$  denote the transition semigroup of a diffusion with drift and diffusion coefficients  $b$  and  $\sigma$ . Define  $\tilde{\varrho}_1(t) = \log(\varrho_2(t)/\varrho_1(t))$ ,  $\tilde{\varrho}_2(t) = [\log(\varrho_1(t)/\varrho_2(t)/\varrho_1(0))]/\log(\varrho_1(t)/\varrho_1(0))$ ,  $\tilde{\alpha}_1 = \alpha$ , and  $\tilde{\alpha}_2 = \inf_{t \geq 0}[\alpha - n\lambda_a(1 \vee \tilde{\varrho}_2(t))]_+$ . If  $f : \mathbb{R}^d \rightarrow \mathbb{R}$  is pseudo-Lipschitz continuous of order  $n$  then  $P_t f$  satisfies the pseudo-Lipschitz bounds*

$$\tilde{\mu}_{1,n}(P_t f) \leq \tilde{\mu}_{1,n}(f)\varrho_1(t)\omega_r(t) \quad \text{and} \quad \tilde{\pi}_{1,n}(P_t f) \leq 2\tilde{\mu}_{1,n}(f)\varrho_1(t)\omega_r(t) \quad (\text{B.2})$$

for

$$\omega_r(t) = 1 + 4\varrho_1(t)^{1-1/r}\varrho_1(0)^{1/2} \left( 1 + 2 \left[ \frac{[1 \vee \tilde{\varrho}_r(t)]2\lambda_a n + 3r\beta}{\tilde{\alpha}_r} \right]^n \right).$$

Furthermore,  $\nabla^2 P_t f$  satisfies the degree- $n$  polynomial growth bound

$$\tilde{\pi}_{2,n}(P_t f) \leq \xi_2 \varrho_1(t-1)\omega_r(t-1) \quad \text{for} \quad (\text{B.3})$$

$$\xi_2 = 4\tilde{\mu}_{1,n}(f) \{1 + (\beta_{r,6n}/\alpha)^{1/6}\} \varrho_1(0)\omega_r(1)\tilde{\pi}_{0,0}(\sigma^{-1}) \left[ 1 + \gamma_{2,2}^{1/2} + \mu_1(\sigma) \right] e^{\theta_{2,2}/2}.$$

If, in addition,  $\tilde{\pi}_{2:3,n}(f) < \infty$ ,  $\nabla^3 P_t f$  satisfies the degree- $n$  polynomial growth bounds, for  $t \geq 2$ ,

$$\tilde{\pi}_{3,n}(P_t f) \leq \xi_3 \varrho_1(t-2)\omega_r(t-1) \quad \text{where} \quad (\text{B.4})$$

$$\begin{aligned} \xi_3 &= 4\tilde{\mu}_{1,n}(f)\tilde{\pi}_{1,0}(\sigma)\tilde{\pi}_{1:2,0}(\sigma)\tilde{\pi}_{0,0}(\sigma^{-1})\tilde{\pi}_{0:1,0}(\sigma^{-1})\varrho_1(0)\omega_r(1)e^{\theta_{3,4}/2} \\ &\quad \times (7 + 7\gamma_{2,2}^{1/2} + \gamma_{2,3}^{1/3} + \gamma_{3,2}^{1/2}) \{1 + (\beta_{r,6n}/\alpha)^{1/6}\}^2, \end{aligned}$$

and, for  $t < 2$ ,

$$\tilde{\pi}_{3,n}(P_t f) \leq 2\tilde{\pi}_{1:3,n}(f) \left(1 + 3\gamma_{2,3}^{1/3} + \gamma_{3,2}^{1/2}\right) e^{t\theta_{3,4}/4} \{1 + (\beta_{r,6n}/\alpha)^{1/6}\}. \quad (\text{B.5})$$

If, in addition,  $\tilde{\pi}_{4,n}(f) < \infty$ ,  $\nabla^4 P_t f$  satisfies the degree- $n$  polynomial growth bounds, for  $t \geq 3$

$$\tilde{\pi}_{4,n}(P_t f) \leq \xi_4 \varrho_1(t-3) \omega_r(t-1), \quad \text{where} \quad (\text{B.6})$$

$$\begin{aligned} \xi_4 &= 4\tilde{\mu}_{1,n}(f) \tilde{\pi}_{1,0}(\sigma)^2 \tilde{\pi}_{1:3,0}(\sigma) \tilde{\pi}_{0,0}(\sigma^{-1})^2 \tilde{\pi}_{0:2,0}(\sigma^{-1}) e^{\theta_{4,2}} \varrho_1(0) \omega_r(1) \{1 + (\beta_{r,6n}/\alpha)^{1/6}\}^3 \\ &\times \left[42 + 32\gamma_{2,2}^{1/2} + 6\gamma_{2,2} + 2\gamma_{2,3}^{1/3} + 3\gamma_{2,3}^{2/3} + 24\gamma_{2,4}^{1/4} + 3\gamma_{2,4}^{1/2} + 12\gamma_{2,6}^{1/6} + 5\gamma_{3,2}^{1/2} + 5\gamma_{3,3}^{1/3} + \gamma_{4,2}^{1/2} + 6\gamma_{2,2}^{1/2} \gamma_{2,6}^{1/6}\right], \end{aligned}$$

and, for  $t < 3$ ,

$$\tilde{\pi}_{4,n}(P_t f) \leq 2\tilde{\pi}_{1:4,n}(f) \{1 + (\beta_{r,6n}/\alpha)^{1/6}\} \left[1 + 6\gamma_{2,4}^{1/4} + 4\gamma_{2,3} + 3\gamma_{2,3}^{2/3} + 4\gamma_{3,3}^{1/3} + \gamma_{4,2}^{1/2}\right] e^{t\theta_{4,2}/2}. \quad (\text{B.7})$$

To establish the first Stein factor bound  $\zeta_1$ , we combine the representation (B.1), the triangle inequality, and the definition of pseudo-Lipschitzness to find that

$$\begin{aligned} |u_f(x) - u_f(y)| &\leq \int_0^\infty |(P_t f)(x) - (P_t f)(y)| dt, \\ &\leq \int_0^\infty \tilde{\mu}_{1,n}(P_t f) dt (1 + \|x\|_2^n + \|y\|_2^n) \|x - y\|_2. \end{aligned}$$

Invoking the pseudo-Lipschitz constant for  $P_t f$  (B.2) now yields the first Stein factor bound.

For each additional Stein factor, the dominated convergence theorem will enable us to differentiate under the integral sign. For the second Stein factor  $\zeta_2$ , using the second derivative of the representation (B.1) and the bound (B.3), we obtain

$$\begin{aligned} |\langle u, \nabla^2 u_f(x) v \rangle| &\leq \int_0^\infty |\langle u, \nabla^2 (P_t f)(x) v \rangle| dt \\ &\leq 4\bar{\rho}_2 \{1 + (\beta_{r,6n}/\alpha)^{1/6}\} \tilde{\mu}_{1,n}(f) (1 + \|x\|_2^n) \|u\|_2 \|v\|_2, \end{aligned}$$

where

$$\begin{aligned} \bar{\rho}_2 &= \int_0^\infty \bar{\xi}_2(1 \wedge t) \varrho_1(t-1 \wedge t) \omega_r(t-1 \wedge t) dt \\ &= \varrho_1(0) \omega_r(0) \int_0^1 \bar{\xi}_2(t) dt + \bar{\xi}_2(1) \int_1^\infty \varrho_1(t-1) \omega_r(t-1) dt, \\ &= \varrho_1(0) \omega_r(0) \tilde{\pi}_{0,0}(\sigma^{-1}) \varrho_1(0) \omega_r(1) e^{\theta_{2,2}/2} \left[2 + \gamma_{2,2}^{1/2} + \mu_1(\sigma)\right] + \bar{\xi}_2(1) \int_0^\infty \varrho_1(t) \omega_r(t) dt. \end{aligned}$$

The final bound is obtained by taking the supremum over  $u$  and  $v$ , i.e.,

$$\|\nabla^2 u_f(x)\|_{\text{op}} = \sup_{\|u\|_2=\|v\|_2=1} \langle u, \nabla^2 u_f(x) v \rangle \leq \zeta_2 (1 + \|x\|_2^n),$$

where

$$\begin{aligned} \zeta_2 &\triangleq 2\xi_2 \varrho_1(0) \omega_r(0) + \xi_2 \int_0^\infty \varrho_1(t) \omega_r(t) dt, \quad \text{with} \\ \xi_2 &= 4\tilde{\mu}_{1,n}(f) \{1 + (\beta_{r,6n}/\alpha)^{1/6}\} \varrho_1(0) \omega_r(1) \tilde{\pi}_{0,0}(\sigma^{-1}) \left[1 + \gamma_{2,2}^{1/2} + \mu_1(\sigma)\right] e^{\theta_{2,2}/2}. \end{aligned}$$

For the third Stein factor  $\zeta_3$ , using the third derivative of the representation (B.1), and the bounds (B.4) and (B.5), we obtain

$$\begin{aligned} |\nabla^3 u_f(x)[v, u, w]| &\leq \int_0^2 |\nabla^3 (P_t f)(x)[v, u, w]| dt + \int_2^\infty |\nabla^3 (P_t f)(x)[v, u, w]| dt \\ &\leq \left[4\tilde{\pi}_{1:3,n}(f) \left(1 + 3\gamma_{2,3}^{1/3} + \gamma_{3,2}^{1/2}\right) e^{\theta_{3,4}/2} \{1 + (\beta_{r,6n}/\alpha)^{1/6}\} \right. \\ &\quad \left. + \xi_3 \int_2^\infty \varrho_1(t-2) \omega_r(t-1) dt\right] (1 + \|x\|_2^n) \|u\|_2 \|v\|_2 \|w\|_2. \end{aligned}$$

Consequently, we obtain

$$\begin{aligned} \|\nabla^3 u_f(x)\|_{\text{op}} &\leq \zeta_3 (1 + \|x\|_2^n) \quad \text{where} \\ \zeta_3 &= 4\tilde{\pi}_{1:3,n}(f) \left(1 + 3\gamma_{2,3}^{1/3} + \gamma_{3,2}^{1/2}\right) \{1 + (\beta_{r,6n}/\alpha)^{1/6}\} + \xi_3 \int_0^\infty \varrho_1(t) \omega_r(t+1) dt \quad \text{and} \\ \xi_3 &= 4\tilde{\mu}_{1,n}(f) \tilde{\pi}_{1,0}(\sigma) \tilde{\pi}_{1:2,0}(\sigma) \tilde{\pi}_{0,0}(\sigma^{-1}) \tilde{\pi}_{0:1,0}(\sigma^{-1}) \varrho_1(0) \omega_r(1) e^{\theta_{3,4}/2} \\ &\quad \times (7 + 7\gamma_{2,2}^{1/2} + \gamma_{2,3}^{1/3} + \gamma_{3,2}^{1/2}) \{1 + (\beta_{r,6n}/\alpha)^{1/6}\}^2. \end{aligned}$$

Lastly, for the fourth Stein factor  $\zeta_4$  using the fourth derivative of the representation (B.1) together with the bounds (B.6) and (B.7),

$$\begin{aligned} |\nabla^4 u_f(x)[v, u, w, y]| &\leq \int_0^3 |\nabla^4(P_t f)(x)[v, u, w, y]| dt + \int_3^\infty |\nabla^4(P_t f)(x)[v, u, w, y]| dt \\ &\leq \left[ 6\tilde{\pi}_{1:4,n}(f) \left[ 1 + 6\gamma_{2,4}^{1/4} + 4\gamma_{2,3} + 3\gamma_{2,3}^{2/3} + 4\gamma_{3,3}^{1/3} + \gamma_{4,2}^{1/2} \right] e^{3\theta_{4,2}/2} \{1 + (\beta_{r,6n}/\alpha)^{1/6}\} \right. \\ &\quad \left. + \xi_4 \int_3^\infty \varrho_1(t-3)\omega_r(t-1)dt \right] (1 + \|x\|_2^n) \|u\|_2 \|v\|_2 \|w\|_2 \|y\|_2. \end{aligned}$$

The final result follows from taking a supremum over  $u, v, w, y$ :

$$\begin{aligned} \|\nabla^4 u_f(x)\|_{\text{op}} &\leq \zeta_4(1 + \|x\|_2^n) \quad \text{where} \\ \zeta_4 &= 6\tilde{\pi}_{1:4,n}(f) \left[ 1 + 6\gamma_{2,4}^{1/4} + 4\gamma_{2,3} + 3\gamma_{2,3}^{2/3} + 4\gamma_{3,3}^{1/3} + \gamma_{4,2}^{1/2} \right] e^{3\theta_{4,2}/2} \{1 + (\beta_{r,6n}/\alpha)^{1/6}\} \\ &\quad + \xi_4 \int_0^\infty \varrho_1(t)\omega_r(t+2)dt, \end{aligned}$$

and

$$\begin{aligned} \xi_4 &= 4\tilde{\mu}_{1,n}(f)\tilde{\pi}_{1,0}(\sigma)^2\tilde{\pi}_{1:3,0}(\sigma)\tilde{\pi}_{0,0}(\sigma^{-1})^2\tilde{\pi}_{0:2,0}(\sigma^{-1})e^{\theta_{4,2}}\varrho_1(0)\omega_r(1) \\ &\quad \times \left\{ 1 + (\beta_{r,6n}/\alpha)^{1/6} \right\}^3 \left[ 42 + 32\gamma_{2,2}^{1/2} + 6\gamma_{2,2} + 2\gamma_{2,3}^{1/3} + 3\gamma_{2,3}^{2/3} + 24\gamma_{2,4}^{1/4} + 3\gamma_{2,4}^{1/2} + 12\gamma_{2,6}^{1/6} \right. \\ &\quad \left. + 5\gamma_{3,2}^{1/2} + 5\gamma_{3,3}^{1/3} + \gamma_{4,2}^{1/2} + 6\gamma_{2,2}^{1/2}\gamma_{2,6}^{1/6} \right]. \end{aligned}$$

## C Proofs of Expected Suboptimality Bounds

*Proof of Prop. 4.1.* We begin by proving the more general claim (4.2). Our dissipativity assumption together with the diffusion moment bounds in [12] implies that  $p(\|\cdot\|_2^2) \leq \beta/\alpha$ . Moreover, as noted in the proof of [25, Prop. 3.4], the differential entropy is bounded by that of a multivariate Gaussian with the same second moments:

$$-p(\log p) \leq \frac{d}{2} \log\left(\frac{2\pi e p(\|\cdot\|_2^2)}{d}\right) \leq \frac{d}{2} \log\left(\frac{2\pi e \beta}{d\alpha}\right).$$

Meanwhile,  $\log p(x^*) = -\log \int p(x)/p(x^*)dx$ . Our smoothness assumption, a polar coordinate transform, and the integral identity of [16, 3.326 2] imply that

$$\begin{aligned} \int p(x)/p(x^*)dx &= \int \exp(\log p(x) - \log p(x^*))dx \geq \int \exp(-C\|x - x^*\|_2^{2\theta})dx \\ &= \int_0^\infty S_{d-1}r^{d-1} \exp(-Cr^{2\theta})dr = S_{d-1} \frac{1}{2\theta} \Gamma\left(\frac{d}{2\theta}\right) C^{-d/(2\theta)} \end{aligned} \quad (\text{C.1})$$

where  $S_{d-1} = 2\frac{\pi^{d/2}}{\Gamma(d/2)}$  is the surface area of the unit sphere in  $\mathbb{R}^d$  and  $\Gamma(\cdot)$  is the Gamma function. Since, by [18, Thm. 2],  $\Gamma(x+y)/\Gamma(y) \geq x^y \frac{x}{x+y}$  for all  $x, y > 0$ ,

$$\begin{aligned} \log p(x^*) &\leq \frac{d}{2\theta} \log(C) - \log\left(\frac{S_{d-1}}{2\theta} \Gamma\left(\frac{d}{2\theta}\right)\right) = \frac{d}{2\theta} \log(C) + \frac{d}{2} \log\left(\frac{1}{\pi}\right) - \log\left(\frac{1}{\theta} \frac{\Gamma(\frac{d}{2\theta})}{\Gamma(\frac{d}{2})}\right) \\ &\leq \frac{d}{2\theta} \log(C) + \frac{d}{2} \log\left(\frac{1}{\pi}\right) - \left(\frac{1}{\theta} - 1\right) \frac{d}{2} \log\left(\frac{d}{2}\right) \\ &\leq \frac{d}{2\theta} \log\left(\frac{2C}{d}\right) + \frac{d}{2} \log\left(\frac{d}{2\pi}\right). \end{aligned} \quad (\text{C.2})$$

The result (4.2) now follows by summing the estimates (C.1) and (C.2).

Now consider the case in which  $p = p_{\gamma,\theta}$ . By design,  $x^*$  is also a global minimizer of  $f$  with  $\nabla f(x^*) = 0$ . Therefore, by Taylor's theorem, we have for each  $x$

$$\begin{aligned} \log p_{\gamma,\theta}(x^*) - \log p_{\gamma,\theta}(x) &= \gamma(f(x) - f(x^*))^\theta \\ &= \gamma(\langle \nabla f(x^*), x - x^* \rangle + \frac{1}{2} \langle x - x^*, \nabla^2 f(x^*)(x - x^*) \rangle)^\theta \\ &\leq \frac{\gamma \mu_\theta^2(f)}{2^\theta} \|x - x^*\|_2^{2\theta}. \end{aligned}$$

The generalized Gibbs result (4.1) now follows from the general claim (4.2) and Jensen's inequality as  $p_{\gamma,\theta}(\gamma(f(x) - f(x^*))^\theta) \geq \gamma p_{\gamma,\theta}^\theta(f(x) - f(x^*))$  for  $\theta \in (0, 1]$ .  $\square$

*Proof of Prop. 4.3.* Let  $\alpha = 1/k$ . We have

$$\mathbb{E}_{x \sim p_{\gamma,\alpha}}[f(x)] - f^* = \frac{\int ((x-b)^\top A(x-b)) \exp(-\gamma((x-b)^\top A(x-b))^\alpha) dx}{\int \exp(-\gamma((x-b)^\top A(x-b))^\alpha) dx}.$$

Using the variable change  $y = A^{1/2}(x - b)$ ,  $dy = \det(A^{1/2})dx$ , the above equals

$$\frac{\int \|y\|^{2\alpha} \exp(-\gamma\|y\|^{2\alpha}) dy}{\int \exp(-\gamma\|y\|^{2\alpha}) dy} = \frac{\int_0^\infty S_{d-1} r^{d-1} \cdot r^{2\alpha} \exp(-\gamma r^{2\alpha}) dr}{\int_0^\infty S_{d-1} r^{d-1} \exp(-\gamma r^{2\alpha}) dr} = \frac{\int_0^\infty r^{d+1} \exp(-\gamma r^{2\alpha}) dr}{\int_0^\infty r^{d-1} \exp(-\gamma r^{2\alpha}) dr},$$

where  $S_{d-1}$  is the surface area of the unit sphere in  $\mathbb{R}^d$ . Substituting an explicit expression for these integrals we get

$$\frac{\Gamma(\frac{d+2}{2\alpha})/2\alpha\gamma^{(d+2)/2\alpha}}{\Gamma(\frac{d}{2\alpha})/2\alpha\gamma^{d/2\alpha}} = \frac{\Gamma(\frac{d}{2\alpha} + \frac{1}{\alpha})}{\Gamma(\frac{d}{2\alpha})} \gamma^{-1/\alpha},$$

where  $\Gamma(\cdot)$  is the Gamma function. Substituting back  $k = 1/\alpha$ , and noting that  $\Gamma(z+1) = z\Gamma(z)$  for all  $z$ , we get that the above equals

$$\frac{\Gamma(\frac{dk}{2} + k)}{\Gamma(\frac{dk}{2})} \gamma^{-k} = \gamma^{-k} \prod_{i=0}^{k-1} (\frac{dk}{2} + i) \leq \gamma^{-k} (\frac{dk}{2} + k - 1)^k = \left( \frac{k(\frac{1}{2}d+1)-1}{\gamma} \right)^k.$$

□

## D Proof of Prop. 3.5: User-friendly Wasserstein decay for Gibbs measures

Define  $\tilde{\sigma}_\gamma(x) = (\sigma_\gamma(x)\sigma_\gamma(x)^\top - s^2 I)^{1/2} = \frac{1}{\sqrt{\gamma}} \tilde{\sigma}(x)$ . Our assumptions imply

$$\begin{aligned} & \frac{\langle b_\gamma(x) - b_\gamma(y), x - y \rangle}{s^2 \|x - y\|_2^2 / 2} + \frac{\|\tilde{\sigma}_\gamma(x) - \tilde{\sigma}_\gamma(y)\|_F^2}{s^2 \|x - y\|_2^2} - \frac{\|(\tilde{\sigma}_\gamma(x) - \tilde{\sigma}_\gamma(y))^\top (x - y)\|_2^2}{s^2 \|x - y\|_2^4} \\ & \leq \frac{-\gamma \langle m(x) \nabla f(x) - m(y) \nabla f(y), x - y \rangle}{s_0^2 \|x - y\|_2^2} + \frac{\langle \nabla, m(x) - m(y) \rangle, x - y + \|\tilde{\sigma}(x) - \tilde{\sigma}(y)\|_F^2}{s_0^2 \|x - y\|_2^2} \\ & \leq \begin{cases} -\frac{\gamma K_m - L^*}{s_0^2} & \text{if } \|x - y\|_2 > R \\ \frac{\gamma L_m + L^*}{s_0^2} & \text{if } \|x - y\|_2 \leq R, \end{cases} \end{aligned}$$

as advertised.

## E Auxiliary Lemmas

**Lemma E.1** (Quadratic form moment bounds). *For  $W_m \sim \mathcal{N}_d(0, I)$  which is independent from  $X_m$ , we have*

$$\mathbb{E}[\|\sigma(X_m)W_m\|_2^{2n}] \leq (2n-1)!! \mathbb{E}[\|\sigma(X_m)\|_F^{2n}].$$

*Proof.* The exact expressions for the quadratic form moments can be found in [21]. We simply use the properties of Frobenius norm to obtain a compact upper bound. □

**Lemma E.2.** *For a sequence of real nonnegative numbers  $\{a_i\}_{i=0}^n$  satisfying  $a_{i+1} \leq \tau a_i + \gamma$  for  $\tau \in (0, 1)$  and  $\gamma \in \mathbb{R}$  we have*

$$\frac{1}{n} \sum_{i=1}^n a_i \leq a_0 + \frac{\gamma}{1-\tau}.$$

*Proof.* By the recursive inequality, we have

$$a_i \leq \tau^i a_0 + \gamma \frac{1-\tau^i}{1-\tau}.$$

Averaging over  $i$ , we obtain

$$\begin{aligned} \frac{1}{n} \sum_{i=1}^n a_i & \leq \frac{1}{n} \sum_{i=1}^n \left( a_0 \tau^i + \gamma \frac{1-\tau^i}{1-\tau} \right), \\ & \leq \frac{a_0 \tau}{n} \frac{1-\tau^n}{1-\tau} + \frac{\gamma}{1-\tau} \leq a_0 + \frac{\gamma}{1-\tau}, \end{aligned}$$

where in the last step, we used  $\tau \leq 1$  and the Bernoulli inequality

$$1 - \tau^n = 1 - (1 - (1 - \tau))^n \leq n(1 - \tau).$$

□

**Lemma E.3.** *For  $x, a, c > 0$  and  $m \geq 1$ , we have  $ax^m + a(c/a)^m/m \geq cx^{m-1}$ .*



*Proof.* The derivative of the polynomial  $p(x) = ax^m - cx^{m-1} + b$  has  $m - 2$  roots at 0, and a root at  $x_0 = c(m - 1)/(am)$ . Therefore,  $p(x)$  for  $x \geq 0$ , attains its minimum value at  $x_0$ . We choose  $b = a(c/a)^m/m$  so that

$$\begin{aligned} p(x_0) &= (ax_0 - c)x_0^{m-1} + b \\ &= b - \frac{ac^m}{ma^m} \left(1 - \frac{1}{m}\right)^{m-1} \geq 0, \end{aligned}$$

where for the last step, we use  $f(x) = (1 - 1/x)^{x-1} \leq 1$  for  $x \geq 1$  and  $\lim_{x \downarrow 1} f(x) = 1$ . □
